# Supplementary material for: Efficacy and safety of radiotherapy combined with anti‐angiogenic therapy and immune checkpoint inhibitors in MSS/pMMR metastatic colorectal cancer
Source: PubMed Central journal article supplement (PMC10807612; doi:10.1002/cam4.6820), 2023-12-19

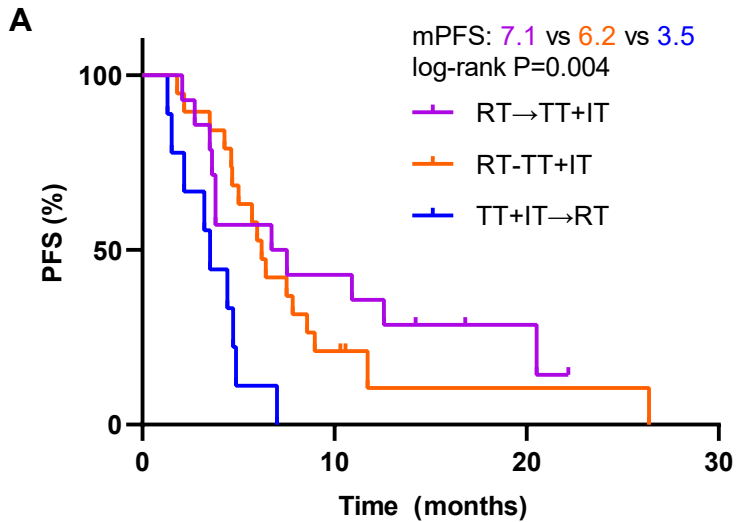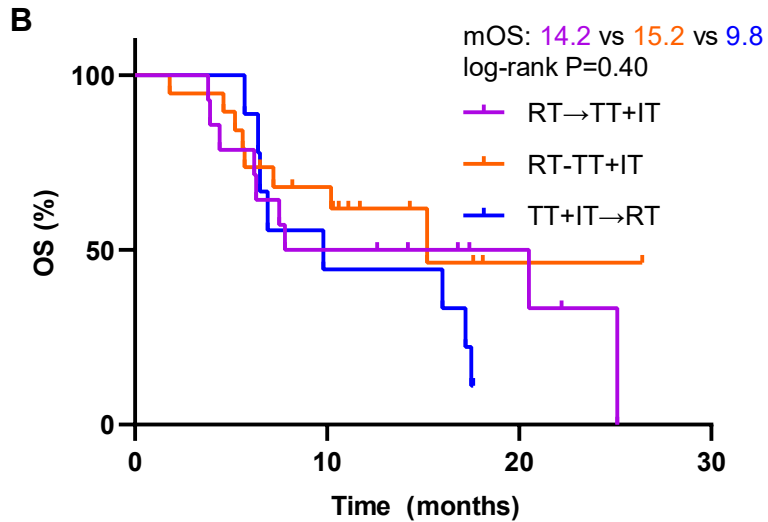

Supplement: CAM4-13-e6820-s003.pdf [file CAM4-13-e6820-s003.pdf]
